# Supplementary material
Source: HighWire-hosted journal article supplement (https://bmjopen.bmj.com/content/10/2/e033337)
Supplement: inline-supplementary-material-1 [file inline-supplementary-material-1.pdf]

## Supplementary Material

### Appendix 1

| <b>Workshop 1: Alcohol and the growing adolescent brain</b>                                                                                                                                                                                                                                                                                                                                                                                                                                                                                                                                                                                                                                                                                                                                                                                                                                                                                                                                                                                                                                                                                                                                                                                                                                                                                                                                                                                                                                                                                                                                                                                                                                                                                                                                                                                                                                                                                                                                                                                                                                                                                                                                                                                      |
|--------------------------------------------------------------------------------------------------------------------------------------------------------------------------------------------------------------------------------------------------------------------------------------------------------------------------------------------------------------------------------------------------------------------------------------------------------------------------------------------------------------------------------------------------------------------------------------------------------------------------------------------------------------------------------------------------------------------------------------------------------------------------------------------------------------------------------------------------------------------------------------------------------------------------------------------------------------------------------------------------------------------------------------------------------------------------------------------------------------------------------------------------------------------------------------------------------------------------------------------------------------------------------------------------------------------------------------------------------------------------------------------------------------------------------------------------------------------------------------------------------------------------------------------------------------------------------------------------------------------------------------------------------------------------------------------------------------------------------------------------------------------------------------------------------------------------------------------------------------------------------------------------------------------------------------------------------------------------------------------------------------------------------------------------------------------------------------------------------------------------------------------------------------------------------------------------------------------------------------------------|
| <ul style="list-style-type: none"> <li>• Examine the outcomes alcohol and drugs are seen to deliver</li> <li>• 7 drug type categories (e.g. stimulants, empathogens, depressants etc.)</li> <li>• Drugs do not have fixed and predictable effects</li> <li>• Compare harms of different drugs</li> <li>• Personal definition of danger</li> <li>• How the brain works (neurons, neurotransmitters, parts of the brain and their function)</li> <li>• How drugs hijack naturally occurring systems to bring about intoxication</li> <li>• Developmental neuroscience and how the growing adolescent brain is different</li> <li>• The brain matures from back to front, with the prefrontal cortex being the last part of the brain to mature</li> <li>• Dose-dependent effects of alcohol in the body and blood alcohol concentration</li> <li>• Locate brain regions affected by alcohol and connect this to intoxicated behaviour</li> <li>• Long-term effects of alcohol on the brain</li> <li>• Understand how the brain changes based on our experiences, a concept called neuroplasticity i.e. the 'use it or lose it' principle</li> <li>• Recent trends in substance use in Australia compared to the individual (people are waiting longer to engage and using less)</li> <li>• Australian guidelines for low risk drinking limits</li> <li>• Normalise abstinence from drug and alcohol use</li> <li>• Tips to resist peer pressure to drink, including why peers should not pressure friends to drink</li> <li>• Respond to a series of situations involving alcohol E.g. Resisting peer influence, when to call an ambulance</li> <li>• How different societal figures are responsible for preventing alcohol and drug related-harm (government, parents, teachers, friends, the individual)</li> <li>• How the individual can minimise the harms of alcohol (short-term and long-term)</li> <li>• Goal-setting tools that increase self-efficacy and reduce the power of peer influence</li> <li>• Appreciate that brain health can be optimised by decreasing stress, using certain techniques such as mindfulness and exercise</li> <li>• Where to find e-resources and valid scientific research on alcohol and drugs</li> </ul> |
| <b>Workshop 2: Drugs, the reward pathway and responding to crisis</b>                                                                                                                                                                                                                                                                                                                                                                                                                                                                                                                                                                                                                                                                                                                                                                                                                                                                                                                                                                                                                                                                                                                                                                                                                                                                                                                                                                                                                                                                                                                                                                                                                                                                                                                                                                                                                                                                                                                                                                                                                                                                                                                                                                            |
| <ul style="list-style-type: none"> <li>• Define society's perception of danger as risk to individual and risk to society</li> <li>• The three dimensions of harm: set, setting and drug</li> <li>• How the bio/psycho/social model can influence the progression of harms with on-going drug use</li> <li>• There is no such thing as a 'soft' or 'hard' drug, risk varies on the drug and the individual</li> <li>• Myth busting around MDMA and cannabis</li> <li>• Varying strength of MDMA and cannabis</li> <li>• Examine the impact of MDMA and cannabis use on the brain over a night</li> <li>• Examine the impact of MDMA and cannabis use on the brain over a year such as to the hippocampus (memory), the amygdala (emotions) and link to mental illness</li> <li>• Case studies and harm minimisation with MDMA and cannabis</li> <li>• Apply concepts in neuroplasticity to MDMA and Cannabis use</li> <li>• Cannabis is an addictive substance</li> <li>• Difference between physical dependence and psychological addiction</li> <li>• Learn the legal frameworks around use, possession &amp; supply</li> </ul>                                                                                                                                                                                                                                                                                                                                                                                                                                                                                                                                                                                                                                                                                                                                                                                                                                                                                                                                                                                                                                                                                                                 |

- Apply concepts in 'the growing adolescent brain' - how to play to our strengths
- Dispel common misconceptions around other recreational drug use. Including non-medical use of prescription drugs
- Learn & share strategies to reduce stress elevate a low mood
- Learn where to go for evidence-based drug and alcohol information

### **Workshop 3: Addiction & mental health**

- Investigate factors that influence addictive behaviour
- Understand the neurological mechanism behind cravings, urges and habit formation
- Understand the way pleasurable things work to induce cravings and repeat behaviour
- Define addiction as a developmental disorder that progresses over time
- Analyse the bio/psycho/social influences that encourage repeat behaviour with alcohol and other drugs
- Critical risk analysis around likelihood of running into problems with a particular behaviour
- Understand the role of the prefrontal cortex in the loss of control over behaviour
- Examine how to break habits and set positive ones
- Understand the stages of change model in behaviour change
- Learn how to use behavioural change tools such as a cost-benefit analysis and urge log
- Brainstorm different psychological triggers, emotional responses and how we like to be treated when we are not feeling ok
- Consolidate learnings and answer any questions around the program

**Appendix 2** The Drug Literacy (knowledge) levels at baseline (n=272) and at post-test (bracketed; n=257).

| Questions                                                                                                                   | Correct (%)    | Incorrect (%)  | Did not know (%) |
|-----------------------------------------------------------------------------------------------------------------------------|----------------|----------------|------------------|
| 1. Young people are starting to drink alcohol at a later age than before                                                    | 17.3<br>(72.8) | 62.9<br>(19.1) | 19.9<br>(8.2)    |
| 2. Most people my age, have tried an illicit substance                                                                      | 42.6<br>(68.0) | 29.0<br>(23.0) | 28.3<br>(9.0)    |
| 3. If you do choose to do drugs, it's better to do them whilst your young than when you're older.                           | 73.5<br>(89.9) | 7.7<br>(5.1)   | 18.8<br>(5.0)    |
| 4. Alcohol is one of the most harmful drugs                                                                                 | 47.1<br>(80.2) | 41.5<br>(15.6) | 11.4<br>(4.3)    |
| 5. The drinking age is 18 because that's when your brain is fully developed                                                 | 30.5<br>(86.8) | 59.9<br>(10.1) | 9.6<br>(3.1)     |
| 6. If someone is heavily intoxicated, you should monitor their breathing and keep them aroused                              | 40.2<br>(81.0) | 19.9<br>(8.9)  | 29.8<br>(10.1)   |
| 7. There are 'SAFE' levels of some drugs                                                                                    | 58.5<br>(51.4) | 23.2<br>(42.0) | 18.4<br>(6.6)    |
| 8. Cannabis can change the structure of your brain if you use it before your brain is fully developed                       | 67.5<br>(89.5) | 8.3<br>(4.7)   | 24.2<br>(5.8)    |
| 9. Cannabis is an addictive substance                                                                                       | 34.9<br>(87.6) | 49.3<br>(7.8)  | 15.8<br>(4.6)    |
| 10. It is reasonably safe for 15 to 17-year-olds to have up to 4 standard drinks on any one day, if they drink occasionally | 14.3<br>(81.7) | 69.9<br>(14.0) | 15.8<br>(4.3)    |
| 11. Being an attendant at a festival gives the police a warrant to search you                                               | 47.6<br>(75.9) | 18.3<br>(12.5) | 34.1<br>(11.6)   |
| 12. Roadside drug tests can detect drugs in the body days after consumption                                                 | 73<br>(90.3)   | 8.7<br>(4.7)   | 18.3<br>(5.1)    |
| 13. Australian youth (18-24 years old) experience mental illness more than any other age group                              | 72.8<br>(86.4) | 6.6<br>(2.7)   | 20.6<br>(10.9)   |
| 14. It is not always legal to possess prescription drugs                                                                    | 69.1<br>(80.2) | 14.7<br>(4.3)  | 16.2<br>(15.6)   |

\* Shaded area represents questions where over half (50%) of the participants answered incorrectly or did not know the answer. Note: the pre- and post-test data include total number of participants at each point.

**Appendix 3** Drug Literacy (skill) levels at baseline (n=246) and post-test test (bracketed; n=240)

|                                                                                              | <b>Strongly Agree</b> | <b>Agree</b>   | <b>Neutral</b> | <b>Disagree</b> | <b>Strongly Disagree</b> |
|----------------------------------------------------------------------------------------------|-----------------------|----------------|----------------|-----------------|--------------------------|
| A. I feel comfortable discussing the risks associated with illicit drugs with my parents (%) | 33.7<br>(38.8)        | 39.0<br>(34.2) | 20.3<br>(15.0) | 4.1<br>(9.6)    | 2.8<br>(2.5)             |
| B. I know where to go for help if I needed it (%)                                            | 37.0<br>(41.7)        | 45.9<br>(48.8) | 12.2<br>(7.1)  | 2.4<br>(0.8)    | 2.4<br>(1.7)             |

|                                                                                          |                |                |                |              |              |
|------------------------------------------------------------------------------------------|----------------|----------------|----------------|--------------|--------------|
| C. The link between drug use and mental illness is clear to me (%)                       | 32.9<br>(41.7) | 43.5<br>(44.2) | 18.7<br>(11.3) | 4.5<br>(2.1) | 0.4<br>(0.8) |
| D. I feel confident that I could minimise the short-term harms associated with drugs (%) | 25.2<br>(33.8) | 34.6<br>(50.0) | 31.3<br>(11.7) | 7.3<br>(3.3) | 1.6<br>(1.3) |
| E. I feel confident that I could minimise the long-term harms associated with drugs (%)  | 26.0<br>(31.7) | 32.9<br>(48.8) | 29.3<br>(12.1) | 9.3<br>(5.8) | 2.4<br>(1.7) |
| F. I do not feel inclined to take drugs (%)                                              | 52.2<br>(43.3) | 22.4<br>(31.7) | 19.6<br>(16.3) | 3.7<br>(5.0) | 2.0<br>(3.8) |

\*Shaded area represents questions where over a quarter (25%) of the participants were neutral or disagreed with the statement.
